# Supplementary material for: Comparison of Heritability of Cystatin C‐ and Creatinine‐Based Estimates of Kidney Function and Their Relation to Heritability of Cardiovascular Disease
Source: PubMed Central journal article supplement — J Am Heart Assoc. 2015 Jan 14;4(1):e001467. doi: 10.1161/JAHA.114.001467 (PMC4330070; doi:10.1161/jaha.114.001467), 2015-01-14
Supplement: jah3-4-e001467-s1.pdf [file jah3-4-e001467-s1.pdf]

## SUPPLEMENTAL MATERIAL

### Correlation Between Absolute Intra-Pair Difference of Adjusted Trait Values and (a) Co-Twin Contact Frequency and (b) Age at Separation From Co-Twin

| Phenotype                    | MZ     |         |      | DZ     |         |      |
|------------------------------|--------|---------|------|--------|---------|------|
|                              | r*     | p-value | n    | r*     | p-value | n    |
| <b>(a) Contact frequency</b> |        |         |      |        |         |      |
| Cystatin C                   | -0.046 | .09     | 1348 | -0.030 | .08     | 3345 |
| Creatinine                   | -0.024 | .38     | 1344 | -0.018 | .31     | 3348 |
| eGFR(Cys C)                  | -0.031 | .26     | 1352 | -0.028 | .11     | 3370 |
| MDRD(Crea)                   | -0.024 | .38     | 1344 | -0.017 | .32     | 3347 |
| Cdk-epi(Cys C+Crea)          | -0.019 | .48     | 1351 | -0.030 | .09     | 3364 |
| Cdk-epi(Cys C)               | -0.031 | .26     | 1352 | -0.029 | .10     | 3369 |
| Cdk-epi(Crea)                | -0.013 | .64     | 1350 | -0.021 | .22     | 3360 |
| <b>(b) Age at Separation</b> |        |         |      |        |         |      |
| Cystatin C                   | 0.016  | .55     | 1352 | -0.008 | .66     | 3361 |
| Creatinine                   | 0.018  | .50     | 1348 | -0.011 | .53     | 3365 |
| eGFR(Cys C)                  | 0.022  | .41     | 1356 | -0.023 | .17     | 3387 |
| MDRD(Crea)                   | 0.018  | .50     | 1348 | -0.011 | .51     | 3364 |
| Cdk-epi(Cys C+Crea)          | 0.018  | .52     | 1355 | -0.023 | .18     | 3381 |
| Cdk-epi(Cys C)               | 0.022  | .42     | 1356 | -0.016 | .34     | 3386 |
| Cdk-epi(Crea)                | 0.014  | .60     | 1354 | -0.014 | .42     | 3377 |

\*Spearman correlation coefficient, Note: p-values remained insignificant when stratified by sex

**Descriptive Statistics of Phenotypes Raw Values and Values After Log Transformation (where applicable)**

| <b>Phenotype</b>                        | <b>Class</b> | <b>N</b> | <b>Mean</b> | <b>SD</b> |
|-----------------------------------------|--------------|----------|-------------|-----------|
| <b>Cystatin C</b>                       |              |          |             |           |
| <i>Unadjusted raw values</i>            | MZ           | 3157     | 1.0037      | 0.2297    |
|                                         | DZ           | 9156     | 1.0228      | 0.3032    |
| <i>Adjusted, z-transformed</i>          | MZ           | 3157     | -0.0393     | 0.9268    |
|                                         | DZ           | 9156     | 0.0063      | 0.9747    |
| <b>Creatinine</b>                       |              |          |             |           |
| <i>Unadjusted raw values</i>            | MZ           | 3157     | 76.4523     | 16.2827   |
|                                         | DZ           | 9156     | 77.8594     | 25.6711   |
| <i>Adjusted, z-transformed</i>          | MZ           | 3157     | -0.0190     | 0.9306    |
|                                         | DZ           | 9156     | -0.00087    | 0.9541    |
| <b>Machine eGFR (Cystatin C)</b>        |              |          |             |           |
| <i>Unadjusted raw values</i>            | MZ           | 3157     | 84.5388     | 21.4733   |
|                                         | DZ           | 9156     | 83.3211     | 21.9672   |
| <i>Adjusted, z-transformed</i>          | MZ           | 3157     | 0.0352      | 0.9808    |
|                                         | DZ           | 9156     | -0.0118     | 1.0051    |
| <b>MDRD (Creatinine)</b>                |              |          |             |           |
| <i>Unadjusted raw values</i>            | MZ           | 3157     | 83.2342     | 16.8222   |
|                                         | DZ           | 9156     | 83.0576     | 18.4596   |
| <i>Adjusted, z-transformed</i>          | MZ           | 3157     | 0.0042      | 0.9102    |
|                                         | DZ           | 9156     | -0.0083     | 0.0230    |
| <b>CKD-epi (Creatinine)</b>             |              |          |             |           |
| <i>Unadjusted raw values</i>            | MZ           | 3157     | 81.1792     | 13.8058   |
|                                         | DZ           | 9156     | 80.8516     | 14.1886   |
| <i>Adjusted, z-transformed</i>          | MZ           | 3157     | 0.0173      | 0.9795    |
|                                         | DZ           | 9156     | -0.0054     | 0.9993    |
| <b>CKD-epi ( Cystatin C)</b>            |              |          |             |           |
| <i>Unadjusted raw values</i>            | MZ           | 3157     | 77.0878     | 19.1120   |
|                                         | DZ           | 9156     | 76.1896     | 19.5713   |
| <i>Adjusted, z-transformed</i>          | MZ           | 3157     | 0.0343      | 0.9822    |
|                                         | DZ           | 9156     | -0.0118     | 1.0058    |
| <b>CKD-epi (Creatinine + Cystain C)</b> |              |          |             |           |
| <i>Unadjusted raw values</i>            | MZ           | 3157     | 77.9351     | 15.7393   |
|                                         | DZ           | 9156     | 77.1999     | 16.1028   |
| <i>Adjusted, z-transformed</i>          | MZ           | 3157     | 0.0341      | 0.0892    |
|                                         | DZ           | 9156     | -0.0114     | 1.0042    |

Adjustment and z-Score Standardization, Stratified by Zygosity

**Univariate ACE/ADE estimates for the lowest quintiles for all Clearance equations**

| <b>Phenotype</b>                  | <b>Sex</b> | <b>h<sup>2</sup></b> | <b>A</b> | <b>C</b> | <b>D</b> | <b>E</b> | <b>Qualitative sex diff</b> | <b>Quantitative sex diff</b> |
|-----------------------------------|------------|----------------------|----------|----------|----------|----------|-----------------------------|------------------------------|
| Cdk-epi(Cys C) <sup>‡</sup>       | M          | 0.77                 | 0.77     | 0.10     |          | 0.13     |                             |                              |
|                                   | F          | 0.70                 | 0.70     | 0.26     |          | 0.04     |                             |                              |
|                                   | Both       | 0.82                 | 0.82     | 0.13     |          | 0.05     | n                           | N                            |
| Cdk-epi(Crea) <sup>‡</sup>        | M          | 0.06                 | 0.06     | 0.00     |          | 0.94     |                             |                              |
|                                   | F          | 0.02                 | 0.02     | 0.00     |          | 0.98     |                             |                              |
|                                   | Both       | 0.00                 | 0.00     | 0.00     |          | 1.00     | n                           | N                            |
| eGFR(Cys C) <sup>*</sup>          | M          | 0.29                 | 0.23     |          | 0.06     | 0.71     |                             |                              |
|                                   | F          | 0.92                 | 0.52     |          | 0.40     | 0.07     |                             |                              |
|                                   | Both       | 0.73                 | 0.25     |          | 0.48     | 0.27     | n                           | Y                            |
| MDRD(Crea) <sup>‡</sup>           | M          | 0.09                 | 0.09     | 0.18     |          | 0.73     |                             |                              |
|                                   | F          | 0.18                 | 0.18     | 0.33     |          | 0.49     |                             |                              |
|                                   | Both       | 0.30                 | 0.30     | 0.18     |          | 0.52     | n                           | N                            |
| Cdk-epi(Cys C+Crea) <sup>‡§</sup> | M          | 0.00                 | 0.00     | 0.00     |          | 1.00     |                             |                              |
|                                   | F          | 0.00                 | 0.00     | 0.00     |          | 1.00     |                             |                              |
|                                   | Both       | 0.00                 | 0.00     | 0.00     |          | 1.00     | n                           | N                            |

All values adjusted for age and sex. \* GFR according to the MDRD formula. † Machine calculated GFR. ° GFR according to the CKD-epi formula. Lowest quintiles as follows: eGFR(Cys C) < 65; MDRD < 70.2; Cdk-epi(Cys C) < 59.6; Cdk-epi(Cys C+Crea) < 64.4; Cdk-epi(Crea) < 69.6. § There were no concordant pairs for this phenotype.

**GCTA analysis lowest quintiles for all Clearance equations**

| <b>Phenotype</b>      | <b>Source</b>       | <b>Variance</b> | <b>SE</b> | <b>P-value</b>        |
|-----------------------|---------------------|-----------------|-----------|-----------------------|
| eGFR(Cys C) *         | V genotypic (g)     | 0.042           | 0.011     | 3.992E <sup>-05</sup> |
|                       | V environmental (e) | 0.121           | 0.011     |                       |
|                       | V phenotypic (p)    | 0.163           | 0.003     |                       |
|                       | V (g) / V (p) §     | 0.257           | 0.067     |                       |
| MDRD(Crea) †          | V genotypic (g)     | 0.000           | 0.010     | 0.500                 |
|                       | V environmental (e) | 0.161           | 0.010     |                       |
|                       | V phenotypic (p)    | 0.161           | 0.003     |                       |
|                       | V (g) / V (p)       | 0.000001        | 0.059     |                       |
| Cdk-epi(Cys C+Crea) ‡ | V genotypic (g)     | 0.024           | 0.010     | 0.006                 |
|                       | V environmental (e) | 0.140           | 0.011     |                       |
|                       | V phenotypic (p)    | 0.164           | 0.003     |                       |
|                       | V (g) / V (p)       | 0.145           | 0.063     |                       |
| Cdk-epi(Cys C) ‡      | V genotypic (g)     | 0.017           | 0.010     | 0.038                 |
|                       | V environmental (e) | 0.144           | 0.010     |                       |
|                       | V phenotypic (p)    | 0.161           | 0.003     |                       |
|                       | V (g) / V (p)       | 0.103           | 0.063     |                       |
| Cdk-epi(Crea) ‡       | V genotypic (g)     | 0.002           | 0.009     | 0.418                 |
|                       | V environmental (e) | 0.159           | 0.010     |                       |
|                       | V phenotypic (p)    | 0.161           | 0.003     |                       |
|                       | V (g) / V (p)       | 0.011           | 0.057     |                       |

All values adjusted for age, sex and correlated principal components. SE= Standard error, V=variance. \* Glomerular filtration rate (GFR) according to the modification of diet in renal disease (MDRD)-formula. † Machine calculated GFR. ‡ GFR according to the CKD-epi formula (Lowest quintiles as follows: eGFR(Cys C) < 65; MDRD < 70.2; Cdk-epi(Cys C) < 59.6; Cdk-epi(Cys C+Crea) < 64.4; Cdk-epi(Crea) < 69.6). § V(g)/V(p) = h<sup>2</sup>(heritability).

**Bivariate heritability analysis Cystatin C & Creatinine vs Stroke & CAD**

|                                               | Males | Females                     | Combined |
|-----------------------------------------------|-------|-----------------------------|----------|
| <b>Bivariate Correlations</b>                 |       | <b>Cystatin C vs STROKE</b> |          |
| Genetic ( $r_a$ )                             | 0.26  | 0.36                        | 0.29     |
| Shared environmental ( $r_c$ )                | 0.59  | -0.46                       | 0.15     |
| Non-shared environmental ( $r_e$ )            | 0.09  | -0.07                       | 0.02     |
| <b>Phenotypic correlation</b>                 | 0.16  | 0.16                        | 0.16     |
| mediated by:                                  |       |                             |          |
| Bivariate heritability (biv $h^2$ )           | 0.61  | 1.22                        | 0.94     |
| Bivariate shared environment (biv $c^2$ )     | 0.10  | 0.00                        | 0.00     |
| Bivariate non-shared environment (biv $e^2$ ) | 0.29  | -0.22                       | 0.06     |
| <b>Bivariate Correlations</b>                 |       | <b>Creatinine vs STROKE</b> |          |
| Genetic ( $r_a$ )                             | 0.40  | 0.36                        | 0.23     |
| Shared environmental ( $r_c$ )                | -0.56 | -0.24                       | 0.94     |
| Non-shared environmental ( $r_e$ )            | -0.04 | -0.21                       | -0.08    |
| <b>Phenotypic correlation</b>                 | 0.07  | 0.09                        | 0.08     |
| mediated by:                                  |       |                             |          |
| Bivariate heritability (biv $h^2$ )           | 1.69  | 2.06                        | 1.56     |
| Bivariate shared environment (biv $c^2$ )     | -0.37 | -0.04                       | 0.00     |
| Bivariate non-shared environment (biv $e^2$ ) | -0.32 | -1.03                       | -0.56    |
| <b>Bivariate Correlations</b>                 |       | <b>Cystatin C vs CAD</b>    |          |
| Genetic ( $r_a$ )                             | 0.28  | -0.20                       | 0.20     |
| Shared environmental ( $r_c$ )                | -0.99 | 0.99                        | 0.99     |
| Non-shared environmental ( $r_e$ )            | 0.04  | 0.16                        | 0.11     |
| <b>Phenotypic correlation</b>                 | 0.15  | 0.16                        | 0.15     |
| mediated by:                                  |       |                             |          |
| Bivariate heritability (biv $h^2$ )           | 0.90  | -0.03                       | 0.69     |
| Bivariate shared environment (biv $c^2$ )     | 0.00  | 0.58                        | 0.01     |
| Bivariate non-shared environment (biv $e^2$ ) | 0.10  | 0.45                        | 0.30     |
| <b>Bivariate Correlations</b>                 |       | <b>Creatinine vs CAD</b>    |          |
| Genetic ( $r_a$ )                             | 0.25  | -0.20                       | 0.11     |
| Shared environmental ( $r_c$ )                | 0.11  | 1.32                        | -0.99    |
| Non-shared environmental ( $r_e$ )            | -0.12 | 0.18                        | 0.03     |
| <b>Phenotypic correlation</b>                 | 0.09  | 0.04                        | 0.07     |
| mediated by:                                  |       |                             |          |
| Bivariate heritability (biv $h^2$ )           | 1.49  | -1.74                       | 0.85     |
| Bivariate shared environment (biv $c^2$ )     | 0.01  | 0.66                        | -0.04    |
| Bivariate non-shared environment (biv $e^2$ ) | -0.50 | 2.08                        | 0.19     |
